# Supplementary material for: Investigating the Influential Factors of Mild Water-Filtered Infrared-A Whole-Body Hyperthermia for Pain Relief in Fibromyalgia: A Mixed-Methods Approach Focusing on Predictors and Patient Perspectives
Source: Biomedicines. 2023 Nov 1;11(11):2949. doi: 10.3390/biomedicines11112949 (PMC10669402; doi:10.3390/biomedicines11112949)
Supplement: Supplementary file 1 [file biomedicines-11-02949-s001.zip › Table S1_Main topics and research aims_R.pdf]

Table S1. Main topics, research aims, and exemplary questions from the interview guideline

| Main topics and research aims                                                                                                                                                                                                                             | Exemplary questions and narrative stimuli                                                                                                                                                                 |
|-----------------------------------------------------------------------------------------------------------------------------------------------------------------------------------------------------------------------------------------------------------|-----------------------------------------------------------------------------------------------------------------------------------------------------------------------------------------------------------|
| <ul style="list-style-type: none"> <li>➤ Experiences with the disease Fibromyalgia in everyday life</li> </ul>                                                                                                                                            | <p>Please tell me about your personal experiences with Fibromyalgia in everyday life.</p> <p>What have you done to treat your disease (the effects of the disease) so far?</p>                            |
| <ul style="list-style-type: none"> <li>➤ Reasons and motivation for participating in whole-body hyperthermia (WBH) therapy study and expectations</li> </ul>                                                                                              | <p>Why did you decide to participate in the study?</p> <p>What were your expectations in advance?</p>                                                                                                     |
| <ul style="list-style-type: none"> <li>➤ Experience with whole-body hyperthermia (WBH) therapy <ul style="list-style-type: none"> <li>• positive and negative aspects; satisfaction</li> <li>• Suggestions for improvement</li> </ul> </li> </ul>         | <p>How did you like the therapy?</p> <p>What did you find particularly good? What did you find less good?</p> <p>What do you think should have been different and what else do you need for yourself?</p> |
| <ul style="list-style-type: none"> <li>➤ Perceived improvements due to therapy <ul style="list-style-type: none"> <li>• Changes in everyday life</li> <li>• Perception of the effectiveness on or change of the disease/one's life</li> </ul> </li> </ul> | <p>Can you please tell me if you have noticed any changes compared to before the therapy?</p> <p>Did/does the therapy affect your life? The disease? If so, in what way? How does it manifest itself?</p> |
| <ul style="list-style-type: none"> <li>➤ Future use of whole-body hyperthermia (WBH) therapy</li> </ul>                                                                                                                                                   | <p>How likely do you think it is that you use again whole-body hyperthermia (WBH) therapy? Why?</p>                                                                                                       |
