# Supplementary material for: Investigating the Influential Factors of Mild Water-Filtered Infrared-A Whole-Body Hyperthermia for Pain Relief in Fibromyalgia: A Mixed-Methods Approach Focusing on Predictors and Patient Perspectives
Source: Biomedicines. 2023 Nov 1;11(11):2949. doi: 10.3390/biomedicines11112949 (PMC10669402; doi:10.3390/biomedicines11112949)
Supplement: Supplementary file 1 [file biomedicines-11-02949-s001.zip › Table S2_Main categories of the coding scheme_R.pdf]

Table S2. Main categories of the coding scheme

| Main codes                                        | Sub codes                                                                                    |
|---------------------------------------------------|----------------------------------------------------------------------------------------------|
| Fibromyalgia in daily life                        | Initial diagnosis                                                                            |
|                                                   | Course of the disease                                                                        |
|                                                   | Consequences of the disease / symptoms (physical, psychological, social level) in daily life |
|                                                   | Measures (therapies) taken against disease so far                                            |
| Reasons for participation in the study            | Motivation                                                                                   |
|                                                   | Expectations                                                                                 |
| Perception and experience of Hyperthermia therapy | Positive aspects and satisfaction                                                            |
|                                                   | Negative aspects and suggestions for improvement                                             |
| Perceived changes                                 | Improvements (psychological, physical, social)                                               |
|                                                   | Worsening (psychological, physical, social)                                                  |
|                                                   | Time point of perceived change                                                               |
|                                                   | Duration of improvement / worsening                                                          |
| Future application of hyperthermia                | Personal interest / aim of future application hyperthermia                                   |
|                                                   | Cost-benefit consideration                                                                   |
|                                                   | Compatibility of application with everyday life                                              |
